# Supplementary material for: Osteopathic manipulative treatment in the management of headaches associated with musculoskeletal dysfunction: systematic review and meta-analysis
Source: publisher site journal article supplement (doi:10.1515/jom-2025-0075), 2025-11-06
Supplement: Supplementary file 1 [file j_jom-2025-0075_suppl_002.docx]

**Supplemental Table 1.** Categorization and Description of Osteopathic Manipulative Treatment (OMT) Interventions and Comparator Interventions Used in the Reviewed Studies (N = 18)

| **Study** | **Study Group Interventions** | **Intervention Description** | **Categorization for Current Reviewa** |
| --- | --- | --- | --- |
| Cerritelli et al (2015) [40] | OMT | Examination (regions not specified). The OMT was based on physical findings and included MFR, BLT, BMT, and craniosacral techniques. Conventional pharmacological care without changes during the study period. | Per clinician |
| Sham OMT | Examination (regions not specified). A light touch to mimic OMT. Conventional pharmacological care without changes during the study period. | Control (sham) |
| Conventional care | Conventional pharmacological care with changes as directed by the personal physician. | Control |
| Deodato et al (2019) [41] | OMT | Examination (regions not specified). The OMT was based on physical findings and included MET, ART, BMT, OCMM, and MFR. Treated areas included the head, cervical, thoracic, ribs, lumbar, sacrum, and pelvis. | Per clinician |
| Amitriptyline | Examination (regions not specified). Amitriptyline 30-50 mg daily based on body weight. | Medication |
| Espí-López and Gómez-Conesa (2014) [42] | OMT ST only | Examination of cervical spine. Nontherapeutic neck massage for 2 minutes. Suboccipital ST (inhibition) for 10 minutes. | ST |
| OMT ART/HVLA only | Examination of cervical spine. Nontherapeutic neck massage for 2 minutes. An ART technique to OAA joint followed by HVLA with rotational thrust. Supine rest for 5 minutes. | ART-HVLA |
| OMT combination | Examination of cervical spine. Nontherapeutic neck massage for 2 minutes. Suboccipital ST (inhibition) for 10 minutes. An ART technique to OAA joint followed by HVLA with rotational thrust. Supine rest for 5 minutes. | ST-ART-HVLA |
| Sham OMT | Examination of cervical spine. Nontherapeutic neck massage for 2 minutes. Supine rest for 10 minutes. | Control |
| Espí-López et al (2014) [43] | OMT ST only | Examination of the upper cervical spine. Suboccipital ST (inhibition) for 10 minutes. Supine rest for 5 minutes. | ST |
| OMT ART/HVLA only | Examination of the upper cervical spine. An ART technique to OAA joint followed by HVLA with rotational thrust. Supine rest for 5 minutes. | ART-HVLA |
| OMT combination | Examination of the upper cervical spine. Suboccipital ST (inhibition) for 10 minutes. An ART technique to OAA joint followed by HVLA with rotational thrust. Supine rest for 5 minutes. | ST-ART-HVLA |
| Sham OMT | Examination of the upper cervical spine. Supine rest for 10 minutes. | Control |
| Espí-López et al (2014) [45] | OMT ST only | Examination of the upper cervical spine. Nontherapeutic neck massage for 2 minutes. Suboccipital ST (inhibition) for 10 minutes. Supine rest for 5 minutes. | ST |
| OMT ART/HVLA only | Examination of the upper cervical spine. Nontherapeutic neck massage for 2 minutes. An ART technique to OAA joint followed by HVLA with rotational thrust. Supine rest for 5 minutes. | ART-HVLA |
| OMT combination | Examination of the upper cervical spine. Nontherapeutic neck massage for 2 minutes. Suboccipital ST (inhibition) for 10 minutes. An ART technique to OAA joint followed by HVLA with rotational thrust. Supine rest for 5 minutes. | ST-ART-HVLA |
| Sham OMT | Examination of the upper cervical spine. Resting position for 10 minutes. | Control |
| Espí-López et al (2016) [46] | OMT ST only | Examination of the upper cervical spine. Suboccipital ST (inhibition) for 10 minutes. Supine rest for 5 minutes. | ST |
| OMT ART/HVLA only | Examination of the upper cervical spine. An ART technique to OAA joint followed by HVLA with rotational thrust. Supine rest for 5 minutes. | ART-HVLA |
| OMT combination | Examination of the upper cervical spine. Suboccipital ST (inhibition) for 10 minutes. An ART technique to OAA joint followed by HVLA with rotational thrust. Supine rest for 5 minutes. | ST-ART-HVLA |
| Sham OMT | Examination of the upper cervical spine. Supine rest for 10 minutes. | Control |
| Espí-López et al (2016) [48] | OMT | Examination of the upper cervical spine. An ART technique to OAA joint followed by HVLA with rotational thrust. Superficial cervical and suboccipital ST massage for 10 minutes. Supine rest for 10 minutes. | ST-ART-HVLA |
| Control/massage | Examination of the upper cervical spine. Superficial cervical and suboccipital ST massage for 10 minutes. Supine rest for 10 minutes. | Control |
| Espí-López et al (2018) [47] | OMT | An ST inhibition (MTrP therapy) for 1 minute each to sternocleidomastoid and upper trapezius muscles bilaterally with a 30-second ST stretch of each muscle. Suboccipital ST (inhibition) for 10 minutes with 30-second suboccipital stretch | ST |
| OMT control | An ST inhibition (MTrP therapy) for 1 minute to the sternocleidomastoid and upper trapezius muscles bilaterally with 30-second ST stretch of each muscle | MTrP (stretch) |
| Espi-Lopez et al (2022) [44] | OMT | Examination of the upper cervical spine. Suboccipital ST (inhibition) for 10 minutes. An ST inhibition for 1 minute to the sternocleidomastoid, repeated up to 5 times, and to the upper trapezius muscles bilaterally with a 30-second ST stretch of each muscle. An ART technique to OAA joint followed by HVLA with rotational thrust. HVLA to lumbosacral area. An ST to the cervical spine and cranium (effleurage, digital petrissage, tapotement, and superficial rubbing and kneading). Supine rest for 10 minutes. | ST-OCMM-ART-HVLA |
| Foam rolling | Examination of the upper cervical spine. Participants performed a foam rolling procedure on muscles of the upper thoracic and trapezius, suboccipital, posterior and lateral cervical, and sacral region for 25 minutes under supervision of a physiotherapist. Supine rest for 10 minutes. | Control |
| Sham OMT | Examination of the upper cervical spine. A series of no-pressure contacts were made to several points on the head and shoulders for 10 minutes. Supine rest for 10 minutes. | Control |
| Esterov et al (2021) [49] | OMT | Examination (regions not specified). The OMT was based on physical findings and included ME, MFR, CS, and ST (suboccipital release) to the cervicothoracic region. Conventional care without changes during the study period. | Per clinician |
| Control | No examination. Conventional care without changes during the study period. | Control |
| Fernández-de-las-Peñas et al (2004) [50] | OMT | Examination of the cervical and thoracic spine. An ST to the cervical and thoracic spine. An HVLA to thoracic spine. Conventional physiotherapy interventions (ultrasound of cervical spine, home exercise, stretching, massage, electrotherapy, and non-OMT manual therapy). | ST-HVLA |
| Control | Examination of the cervical and thoracic spine. Conventional physiotherapy interventions (ultrasound of cervical spine, home exercise, stretching, massage, electrotherapy, and non-OMT manual therapy). | Control |
| Gandolfi et al (2018) [51] | OMT | Rest for 5 minutes. An MFR to the cervical spine. An ART to the cervical spine, OA, and midthoracic spine. Rest for 5 minutes. | MFR-ART |
| TENS | Rest for 5 minutes. Had TENS to trigger points of the upper trapezius muscle 20 minutes. Rest for 5 minutes. | Control |
| Hoyt et al (1979) [52] | OMT | Examination of the axial skeleton. An ST (kneading, deep pressure, and stretching) over the spine followed by HVLA techniques for any identified dysfunctions. | ST-HVLA |
| Control (sham OMT) | Examination of the axial skeleton. | Control |
| Muñoz-Gómez et al (2021) [54] | OMT | Examination of the upper cervical spine. An ART technique to OAA joint followed by HVLA with rotational thrust. An ART and HVLA to OA, cervical and thoracic spine (T1-T6), and L5 and SI joints. | ART-HVLA |
| Sham OMT | Examination of the upper cervical spine. Palms of both hands gently placed under occiput for 10 minutes without treatment. | Control |
| Muñoz-Gómez et al (2022) [55] | OMT ST/OCMM only | Examination of the upper cervical spine. Suboccipital ST (inhibition) for 10 minutes followed by OCMM (frontal technique, sphenoid technique, CV4, and lumbosacral decompression). Supine rest for 10 minutes. | ST-OCMM |
| OMT ART/HVLA only | Examination of the upper cervical spine. An ART technique to OAA joint followed by HVLA with rotational thrust. An ART and HVLA to OA, cervical and thoracic spine (T1-T6), and L5 and SI joints. Supine rest for 10 minutes. | ART-HVLA |
| OMT combination | Examination of the upper cervical spine. An ART technique to OAA joint followed by HVLA with rotational thrust. An ART and HVLA to OA, cervical and thoracic spine (T1-T6), and L5 and SI joints. Suboccipital ST (inhibition) for 10 minutes followed by OCMM (frontal technique, sphenoid technique, CV4, and lumbosacral decompression). Supine rest for 10 minutes. | ST-OCMM-ART-HVLA |
| Muñoz-Gómez et al (2022) [53] | OMT | Examination of the upper cervical spine. Suboccipital ST (inhibition) for 10 minutes followed by OCMM (frontal technique, sphenoid technique, CV4, and lumbosacral decompression). Supine rest for 10 minutes. | ST-OCMM |
| Sham OMT | Examination of the upper cervical spine. Palms of both hands gently placed under occiput for 10 minutes without treatment. Supine rest for 10 minutes. | Control |
| Rolle et al (2014) [56] | OMT | Examination (regions not specified). The OMT was based on physical findings and included MFR, HVLA, visceral, and craniosacral techniques. | Per clinician |
| Sham OMT | Examination of cranial rhythmic impulse. | Control |
| Voigt et al (2011) [57] | OMT | Examination (regions not specified). The OMT was based on physical findings and included manual therapy (techniques not specified), visceral manipulation, and OCMM techniques. | Per clinician |
| Control | No examination or treatment | Control |

aPer clinician techniques were performed at the discretion of the treating clinician and were based on physical findings. The protocol could include a variety of direct and indirect osteopathic manipulative medicine technique types such as MFR, BLT, BMT, and OCMM.

Abbreviations: ART, articulatory technique (includes springing and low-velocity, moderate-amplitude techniques); BLT, balanced ligamentous tension; BMT, balanced membranous tension (type of OCMM technique); CS, counterstain; CV4, compression of the fourth ventricle (type of OCMM technique); HVLA, high-velocity, low-amplitude (includes all thrust techniques); MET, muscle energy technique; MFR, myofascial release; MTrP, myofascial trigger point therapy; OA, occipitoatlantial joint; OAA, occiput-atlas-axis joints; OCMM: osteopathic cranial manipulative medicine techniques (includes a wide variety of direct and indirect techniques); OMT, osteopathic manipulative treatment; ST, soft tissue (includes massage and inhibition); TENS, transcutaneous electrical nerve stimulation.

**Supplemental Table 2.** Summary of Outcome Variables for Unpoolable Data in the Reviewed Studies (N = 18)

| **Study** | **Intervention (No. Participants)** | **Comparator (No. Participants)** | **Effect Estimatea, SMD (95% CI)** | **Comments** |
| --- | --- | --- | --- | --- |
| Headache Severity for OMT Protocol I vs OMT Protocol II | | | | |
| Espí-López et al (2018) [47] | ST (n = 22) | MTrP/stretch (n = 21) | −0.69 (−1.30 to −0.07) | When compared with MTrP, the ST significantly reduced headache severity. |
| Muñoz-Gómez et al (2022) [55] | ST-OCMM-ART-HVLA (n = 25) | ST-OCMM (n = 25) | 0.25 (−0.31 to 0.81) | Despite changes in scores, the combined ST and ART techniques and the ST technique only were not significantly associated with reducing headache severity. |
| Muñoz-Gómez et al (2022) [55] | ST-OCMM-ART-HVLA (n = 25) | ART-HVLA (n = 25) | 0.14 (−0.41 to 0.70) |
| Muñoz-Gómez et al (2022) [55] | ST-OCMM (n = 25) | ART-HVLA (n = 25) | −0.11 (−0.66 to 0.45) |
| Headache Severity for OMT vs Control Group | | | | |
| Espi-Lopez et al (2022) [44] | ST-OCMM-ART-HVLA (n = 13) | Control group (n = 25) | −0.78 (−1.48 to −0.09) | In 3 (n = 110) of 7 (n = 298) comparisons, OMT significantly reduced headache severity when compared with control. |
| Fernández-de-las-Peñas et al (2004) [50] | HVLA (n = 44) | Control group (n = 44) | *P* = .78 |
| Gandolfi et al (2018) [51] | MFR-ART (n = 12) | Control group (n = 10) | Not significant |
| Hoyt et al (1979) [52] | ST-HVLA (n = 10) | Control group (n = 12) | −1.43 (−2.39 to −0.47) |
| Muñoz-Gómez et al (2022) [53] | ST-OCMM (n = 25) | Control group (n = 25) | −0.64 (−1.21 to −0.07) |
| Rolle et al (2014) [56] | Per clinician (n = 21) | Control group (n = 19) | Between-group differences not reported |
| Voigt et al (2011) [57] | Per clinician (n = 19) | Control group (n = 19) | −0.17 (−0.80 to 0.47) |
| Headache Frequency for OMT Protocol I vs OMT Protocol II | | | | |
| Espí-López et al (2018) [47] | ST (n = 22) | MTrP/stretch (n = 21) | −0.52 (−1.13 to −0.07) | When compared with MTrP, the ST was not significantly associated with reducing headache frequency. |
| Muñoz-Gómez et al (2022) [55] | ST-OCMM-ART-HVLA (n = 25) | ST-OCMM (n = 25) | −0.05 (−0.61 to 0.50) | Combined ST and ART techniques and the ST technique only were not significantly associated with reducing headache frequency. |
| Muñoz-Gómez et al (2022) [55] | ST-OCMM-ART-HVLA (n = 25) | ART-HVLA (n = 25) | −0.03 (−0.58 to 0.52) |
| Muñoz-Gómez et al (2022) [55] | ST-OCMM (n = 25) | ART-HVLA (n = 25) | 0.05 (−0.50 to 0.61) |
| Headache Frequency for OMT vs Control Group | | | | |
| Espi-Lopez et al (2022) [44] | ST-OCMM-ART-HVLA (n = 13) | Control group (n = 25) | 0.75 (0.19 to 3.05)b | In 1 (n = 40) of 4 (n = 138) studies, OMT was significantly associated with a lower headache frequency than control. |
| Gandolfi et al (2018) [51] | MFR-ART (n = 12) | Control group (n = 10) | −0.23 (−1.08 to 0.61) |
| Rolle et al (2014) [56] | Per clinician (n = 21) | Control group (n = 19) | *P* < .001 |
| Voigt et al (2011) [57] | Per clinician (n = 19) | Control group (n = 19) | 0.00 (−0.63 to 0.64) |
| Disability Associated with Headaches for OMT Protocol I vs OMT Protocol II | | | | |
| Espí-López et al (2018) [47] | ST (n = 22) | MTrP/stretch (n = 21) | −0.64 (−1.26 to −0.03) | When compared with MTrP, the ST was significantly associated with reducing disability associated with headaches. |
| Muñoz-Gómez et al (2022) [55] | ST-OCMM-ART-HVLA (n = 25) | ST-OCMM (n = 25) | −0.00 (−0.56 to 0.55) | Combined ST and ART techniques and the ST technique only were not significantly associated with reducing disability associated with headaches. |
| Muñoz-Gómez et al (2022) [55] | ST-OCMM-ART-HVLA (n = 25) | ART-HVLA (n = 25) | 0.06 (−0.50 to 0.61) |
| Muñoz-Gómez et al (2022) [55] | ST-OCMM (n = 25) | ART-HVLA (n = 25) | 0.05 (−0.51 to 0.60) |
| Disability Associated with Headaches for OMT vs Control Group | | | | |
| Espi-Lopez et al (2022) [44] | ST-OCMM-ART-HVLA (n = 13) | Control group (n = 25) | −0.19 (−0.86 to 0.48) | In 1 (n = 50) of 5 (n = 210) comparisons, OMT significantly reduced disability associated with headaches when compared with control. |
| Gandolfi et al (2018) [51] | MFR-ART (n = 12) | Control group (n = 10) | 0.01 (−0.83 to 0.85) |
| Muñoz-Gómez et al (2022) [53] | ST-OCMM (n = 25) | Control group (n = 25) | −0.61 (−1.18 to −0.04) |
| Rolle et al (2014) [56] | Per clinician (n = 21) | Control group (n = 19) | Between-group differences are not reported |
| Voigt et al (2011) [57] | Per clinician (n =19) | Control group (n = 19) | −0.01 (−0.57 to 0.55) |
| Disability Associated with Headaches for OMT vs Medications | | | | |
| Cerritelli et al (2015) [40] | Per clinician (n = 35) | Medications (n = 35) | −0.05 (−0.52 to 0.42) | The OMT was not significantly associated with reduction in disability when compared with the use of medications. |
| Quality of Life Physical Component Score from SF-36 | | | | |
| Espí-López et al (2018) [47] | ST (n = 22) | MTrP/stretch (n = 21) | 0.03 (−0.56 to 0.63) | The ST was not associated with improvement in the SF-36 physical component scores. |
| Muñoz-Gómez et al (2021) [54] | ART-HVLA (n = 25) | Control group (n = 25) | 0.55 (−0.01 to 1.12) | Combined ART-HVLA was not associated with improvement in the SF-36 physical component scores. |
| Quality of Life Mental Component Score from SF-36 | | | | |
| Espí-López et al (2018) [47] | ST (n = 22) | MTrP/stretch (n = 21) | 0.05 (−0.55 to 0.65) | The ST was not associated with improvement in the SF-36 mental component scores. |
| Muñoz-Gómez et al (2021) [54] | ART-HVLA (n = 25) | Control group (n = 25) | 0.25 (−0.31 to 0.80) | Combined ART-HVLA was not associated with improvement in the SF-36 mental component scores. |
| Quality of Life SF-12 Health Questionnaire | | | | |
| Espí-López et al (2016) [46] | ST (n = 19) | Control group (n = 19) | −0.13 (−0.76 to 0.51) | The OMT was not significantly associated with improvement in QOL when compared with control. |
| Espí-López et al (2016) [46] | ST-ART-HVLA (n = 19) | Control group (n = 19) | 0.21 (−0.43 to 0.85) |
| Quality of Life HIT-6 for OMT Protocol I vs OMT Protocol II | | | | |
| Espí-López et al (2018) [47] | ST (n = 22) | MTrP/stretch (n = 21) | −0.98 (−1.62 to −0.34) | The ST was significantly associated with decreasing the impact of headaches on QOL. |
| Muñoz-Gómez et al (2022) [55] | ST-OCMM-ART-HVLA (n = 25) | ST-OCMM (n = 25) | 0.37 (−0.19 to 0.93) | Combined ST and ART techniques and the ST technique only were not significantly associated with reducing the impact of headaches on QOL. |
| Muñoz-Gómez et al (2022) [55] | ST-OCMM-ART-HVLA (n = 25) | ART-HVLA (n = 25) | 0.25 (−0.31 to 0.80) |
| Muñoz-Gómez et al (2022) [55] | ST-OCMM (n = 25) | ART-HVLA (n = 25) | −0.16 (−0.72 to 0.39) |
| Quality of Life HIT-6 for OMT vs Control Group | | | | |
| Espí-López et al (2014) [43] | ST (n = 20) | Control group (n = 20) | −0.16 (−0.78 to 0.46) | The OMT was not significantly associated with a decreased impact of headaches on QOL. |
| Espí-López et al (2014) [43] | ART-HVLA (n = 20) | Control group (n = 20) | −0.47 (−1.10 to 0.16) |
| Espí-López et al (2014) [43] | ST-ART-HVLA (n = 20) | Control group (n = 20) | −0.40 (−1.02 to 0.23) |
| Espi-Lopez et al (2022) [44] | ST-OCMM-ART-HVLA (n = 13) | Control group (n = 25) | −0.09 (−0.76 to 0.58) |
| Gandolfi et al (2018) [51] | MFR-ART (n = 12) | Control group (n = 10) | 0.15 (−0.70 to 0.99) |
| Quality of Life HIT-6 for OMT vs Medications | | | | |
| Cerritelli et al (2015) [40] | Per clinician (n = 35) | Medications (n = 70) | −0.98 (−1.40 to −0.55) | When compared with medications, OMT was not significantly associated with a decreased impact of headaches on QOL. |
| Return to Workc | | | | |
| Voigt et al (20110 [57] | Per clinician (n = 35) | Control group (n = 35) | −0.14 (−0.75 to 0.46) | The OMT was not significantly associated with days of disablement. |

aSome reviewed studies reported significance level instead of effect estimates.

bData are reported as odds ratio and 95% confidence interval.

cReturn to work is reported as days of disablement.

Abbreviations: ART, articulatory technique (includes springing and low-velocity, moderate-amplitude techniques); BLT, balanced ligamentous tension; BMT, balanced membranous tension (type of OCMM technique); CI, confidence interval; HIT-6, Headache Impact Test 6 questionnaire; HVLA, high-velocity, low-amplitude (includes all thrust techniques); MFR, myofascial release; MTrP, myofascial trigger point therapy; OCMM: osteopathic cranial manipulative medicine techniques (includes a wide variety of direct and indirect techniques); OMT, osteopathic manipulative treatment; QOL, quality of life; SF-12, Short Form 12 health survey; SF-36, Short Form 36 health survey; ST, soft tissue (includes massage and inhibition); Per clinician (included MFR-BLT-BMT-OCMM).
