# Supplementary material for: Osteopathic manipulative treatment in the management of headaches associated with musculoskeletal dysfunction: systematic review and meta-analysis
Source: publisher site journal article supplement (doi:10.1515/jom-2025-0075), 2025-11-06
Supplement: Supplementary file 2 [file j_jom-2025-0075_suppl_003.docx]

**Appendix 1.** Search Strategy Used in the Current Systematic Review.

| **Concept** | **Terms** | **MeSH** |
| --- | --- | --- |
| OMM, manual therapy  osteopath* | osteopath*  HVLA  manual therap*  manipulative therap*  cervical manipul*  lumbar manipul*  craniosacral manipul*  craniosacral technique*  visceral manipul*  Soft tissue manipul*  Soft tissue therap*  High velocity low amplitude  Cranial manipul  Articular technique  Osteopathic adj3 massag*  Muscle energy technique*  Facilitated positional release  Counterstrain  Still technique  Cranial osteopath*  Myofascial release (MRT)  Craniosacral massag*  Thrust manipul*  Trigger point  Tender point  Dry needl*  Spinal manipul*  OMM  osteopathic manual therapy  osteopathic manipulative treatment  osteopathic technique  OMT  OPP  Manual medicine  Manual manipul*  OMTh  SMT | Osteopathic physicians  Manipulation, osteopathic  Osteopathic medicine  Manipulation, spinal  Musculoskeletal manipulations (noexp) |
| Headache, concussion, head injury | Cephalgia  Whiplash associated disorder*  Fibromyalgia  Primary headache*  Migraine adj3 aura  Migraine without aura  Cluster headache  Tension-type headache  New daily persistent headaches  Cervicogenic headache*  Temporal mandibular joint disorder*  Secondary headache*  TTH | Headache disorders, primary  Post-traumatic headache  Headache Disorders (noexp)  Post-concussion syndrome  Whiplash injuries  Fibromyalgia  Temporomandibular joint disorders  Headache disorders, secondary (noexp) |

**PubMed Search Strategy**

(“osteopath*”[tiab] OR “HVLA”[tiab] OR “manual therap*”[tiab] OR “manipulative therap*”[tiab] OR “cervical manipul*”[tiab] OR “lumbar manipul*”[tiab] OR “craniosacral manipul*”[tiab] OR “craniosacral technique*”[tiab] OR “visceral manipul*”[tiab] OR “Soft tissue manipul*”[tiab] OR “Soft tissue therap*”[tiab] OR “High velocity low amplitude”[tiab] OR “osteopathic massage”[tiab:~3] OR “muscle energy technique*”[tiab] OR “facilitated positional release”[tiab] OR “cranial osteopath*”[tiab] OR “myofascial release”[tiab] OR “MRT”[tiab] OR “craniosacral massag*”[tiab] OR “thrust manipul*”[tiab] OR “trigger point”[tiab] OR “dry needl*”[tiab] OR “spinal manipul*”[tiab] OR “OMM”[tiab] OR “OMT”[tiab] OR “OPP”[tiab] OR “manual medicine”[tiab] OR “manual manipul*”[tiab] OR “OMTh”[tiab] OR “SMT”[tiab] OR “cranial manipul*”[tiab] OR “articular technique*”[tiab] OR “counterstrain”[tiab] OR “still technique”[tiab] OR “tender point”[tiab] OR “Osteopathic Physicians”[mesh] OR “Manipulation, Osteopathic”[mesh] OR “Osteopathic Medicine”[mesh] OR “Manipulation, Spinal”[mesh] OR “Musculoskeletal Manipulations”[mesh:noexp]) AND (“cephalgia”[tiab] OR “whiplash associated disorder*”[tiab] OR “fibromyalgia”[tiab] OR “Primary headache*”[tiab] OR “aura migraine”[tiab:~3] OR “aura migraines”[tiab:~3] OR “migraine without aura”[tiab] OR “cluster headache*”[tiab] OR “tension type headache*”[tiab] OR “new daily persistent headache*”[tiab] OR “cervicogenic*”[tiab] OR “temporal mandibular joint disorder*”[tiab] OR “secondary headache*”[tiab] OR “TTH”[tiab] OR “Headache Disorders, Primary”[mesh] OR “Post-Traumatic Headache”[mesh] OR “Headache Disorders”[mesh:noexp] OR “Post-Concussion Syndrome”[mesh] OR “Whiplash Injuries”[mesh] OR “Fibromyalgia”[mesh] OR “Temporomandibular Joint Disorders”[mesh] OR “Headache Disorders, Secondary”[mesh:noexp])

Date searched: July 31, 2023

No. results: 1318

**PsycINFO Search Strategy**

Thesaurus Terms

- Osteopathic medicine
- Physical treatment methods (noexp)
- Headache (exp)
- Post-concussive symptoms
- Whiplash
- Fibromyalgia

((TI osteopath* OR AB osteopath*) OR (TI HVLA OR AB HVLA) OR (TI "manual therap*" OR AB "manual therap*") OR (TI "manipulative therap*" OR AB "manipulative therap*") OR (TI "cervical manipul*" OR AB "cervical manipul*") OR (TI "lumbar manipul*" OR AB "lumbar manipul*") OR (TI "craniosacral manipul*" OR AB "craniosacral manipul*") OR (TI "craniosacral technique*" OR AB "craniosacral technique*") OR (TI "visceral manipul*" OR AB "visceral manipul*") OR (TI "Soft tissue manipul*" OR AB "Soft tissue manipul*") OR (TI "Soft tissue therap*" OR AB "Soft tissue therap*") OR (TI "High velocity low amplitude" OR AB "High velocity low amplitude") OR (TI osteopathic N3 massage) OR (AB osteopathic N3 massage) OR (TI "muscle energy technique*" OR AB "muscle energy technique*") OR (TI "facilitated positional release" OR AB "facilitated positional release") OR (TI "cranial osteopath*" OR AB "cranial osteopath*") OR (TI "myofascial release" OR AB "myofascial release") OR (TI MRT OR AB MRT) OR (TI "craniosacral massag*" OR AB "craniosacral massag*") OR (TI "thrust manipul*" OR AB "thrust manipul*") OR (TI "trigger point" OR AB "trigger point") OR (TI "dry needl*" OR AB "dry needl*") OR (TI "spinal manipul*" OR AB "spinal manipul*") OR (TI OMM OR AB OMM) OR (TI OMT OR AB OMT) OR (TI OPP OR AB OPP) OR (TI "manual medicine" OR AB "manual medicine") OR (TI "manual manipul*" OR AB "manual manipul*") OR (TI OMTh OR AB OMTh) OR (TI SMT OR AB SMT) OR (TI "cranial manipul*" OR AB "cranial manipul*") OR (TI "articular technique*" OR AB "articular technique*") OR (TI counterstrain OR AB counterstrain) OR (TI "still technique" OR AB "still technique") OR (TI "tender point" OR AB "tender point") OR (DE "Osteopathic Medicine") OR (DE "Physical Treatment Methods")) AND ((TI cephalgia OR AB cephalgia) OR (TI "whiplash associated disorder*" OR AB "whiplash associated disorder*") OR (TI fibromyalgia OR AB fibromyalgia) OR (TI "Primary headache*" OR AB "Primary headache*") OR (TI aura N3 migraine) OR (AB aura N3 migraine) OR (TI aura N3 migraines) OR (AB aura N3 migraines) OR (TI "migraine without aura" OR AB "migraine without aura") OR (TI "cluster headache*" OR AB "cluster headache*") OR (TI "tension type headache*" OR AB "tension type headache*") OR (TI "new daily persistent headache*" OR AB "new daily persistent headache*") OR (TI cervicogenic* OR AB cervicogenic*) OR (TI "temporal mandibular joint disorder*" OR AB "temporal mandibular joint disorder*") OR (TI "secondary headache*" OR AB "secondary headache*") OR (TI TTH OR AB TTH) OR (DE "Headache") OR (DE "Migraine Headache") OR DE ("Muscle Contraction Headache") OR (DE "Post-Concussive Symptoms") OR (DE "Whiplash") OR (DE "Fibromyalgia"))

Date searched: July 31, 2023

No. results: 246

**Cochrane Central Register of Controlled Trials (CENTRAL) Search Strategy**

(osteopath*:ti,ab,kw OR HVLA:ti,ab,kw OR ("manual" NEXT therap*):ti,ab,kw OR ("manipulative" NEXT therap*):ti,ab,kw OR ("cervical" NEXT manipul*):ti,ab,kw OR ("lumbar" NEXT manipul*):ti,ab,kw OR ("craniosacral" NEXT manipul*):ti,ab,kw OR ("craniosacral" NEXT technique*):ti,ab,kw OR ("visceral" NEXT manipul*):ti,ab,kw OR ("Soft tissue" NEXT manipul*):ti,ab,kw OR ("Soft tissue" NEXT therap*):ti,ab,kw OR "High velocity low amplitude":ti,ab,kw OR (osteopathic NEAR/n3 massage):ti,ab,kw OR ("muscle energy" NEXT technique*):ti,ab,kw OR "facilitated positional release":ti,ab,kw OR ("cranial" NEXT osteopath*):ti,ab,kw OR "myofascial release":ti,ab,kw OR MRT:ti,ab,kw OR ("craniosacral" NEXT massag*):ti,ab,kw OR ("thrust" NEXT manipul*):ti,ab,kw OR "trigger point":ti,ab,kw OR ("dry" NEXT needl*):ti,ab,kw OR ("spinal" NEXT manipul*):ti,ab,kw OR OMM:ti,ab,kw OR OMT:ti,ab,kw OR OPP:ti,ab,kw OR "manual medicine":ti,ab,kw OR ("manual" NEXT manipul*):ti,ab,kw OR OMTh:ti,ab,kw OR SMT:ti,ab,kw OR ("cranial" NEXT manipul*):ti,ab,kw OR ("articular" NEXT technique*):ti,ab,kw OR counterstrain:ti,ab,kw OR "still technique":ti,ab,kw OR "tender point":ti,ab,kw OR [mh "Osteopathic Physicians"] OR [mh "Manipulation, Osteopathic"] OR [mh "Osteopathic Medicine"] OR [mh "Manipulation, Spinal"] OR [mh ^"Musculoskeletal Manipulations"]) AND (cephalgia:ti,ab,kw OR ("whiplash associated" NEXT disorder*):ti,ab,kw OR fibromyalgia:ti,ab,kw OR ("Primary" NEXT headache*):ti,ab,kw OR (aura NEAR/3 migraine*):ti,ab,kw OR "migraine without aura":ti,ab,kw OR ("cluster" NEXT headache*):ti,ab,kw OR ("tension type" NEXT headache*):ti,ab,kw OR ("new daily persistent" NEXT headache*):ti,ab,kw OR cervicogenic*:ti,ab,kw OR ("temporal mandibular joint" NEXT disorder*):ti,ab,kw OR ("secondary" NEXT headache*):ti,ab,kw OR TTH:ti,ab,kw OR [mh "Headache Disorders, Primary"] OR [mh "Post-Traumatic Headache"] OR [mh ^"Headache Disorders"] OR [mh "Post-Concussion Syndrome"] OR [mh "Whiplash Injuries"] OR [mh Fibromyalgia] OR [mh "Temporomandibular Joint Disorders"] OR [mh ^"Headache Disorders, Secondary"])

Only clinical trials were searched, and the search was limited to trials published in last 2 years.

Date searched: July 31, 2023

No. results: 177

**ClinicalTrials.gov Search Strategy**

Condition or disease: Headache OR Migraine

Intervention/treatment: Osteopathic Manipulative Treatment OR Osteopathic Manipulative Therapy OR Osteopathic Manipulative Medicine

Only searched for studies with results.

Date searched: July 31, 2023

No. results: 1

**Physiotherapy Evidence Database (PEDro) Search Strategy**

Abstract and title: headache*

Therapy: stretching, mobilization, manipulation, massage

Method: clinical trial

Date searched: July 31, 2023

No. results: 169

**Allied and Complementary Medicine Database (AMED) Search Strategy**

1 exp headache/ (1579)

2 cephalgia.mp. (5)

3 exp neck pain/ or exp whiplash injury/ (1417)

4 whiplash associated disorder*.mp. (216)

5 exp fibromyalgia/ (1788)

6 fibromyalgia.mp. (2000)

7 exp primary headache/ or exp migraine/ or exp cluster headache/ or exp tension headache/ (556)

8 Primary headache*.mp. (25)

9 migraine aura.mp. (6)

10 (migraine adj 5 aura).mp. [mp=abstract, heading words, title] (0)

11 aura migraine.mp. (2)

12 cluster headache*.mp. (16)

13 tension type headache*.mp. (133)

14 exp new daily persistent headache/ or new daily persistent headache*.mp. (1)

15 cervicogenic headache.mp. (77)

16 exp temporomandibular joint/ or exp temporomandibular joint disorder/ (128)

17 exp secondary headache/ or secondary headache*.mp. (5)

18 Headache Disorders, Primary.mp. (0)

19 exp Whiplash injuries/ or exp Head injuries/ or exp Brain injuries/ or posttraumatic headache.mp. (6852)

20 Post-Traumatic Headache.mp. (7)

21 Headache Disorders.mp. (31)

22 Post-Concussion Syndrome.mp. (24)

23 Whiplash Injuries.mp. or exp whiplash injury/ (586)

24 Temporomandibular Joint Disorders.mp. (35)

25 Fibromyalgia.mp. (2000)

26 Headache Disorders, Secondary.mp. (0)

27 Temporomandibular Joint Dysfunction Syndrome.mp. (4)

28 (concussion adj5 headaches).mp. (4)

29 or/1-28 (11797)

30 osteopathic physician.mp. or exp Osteopathy/ (1754)

31 osteopath.mp. (59)

32 exp manipulative medicine/ or HVLA.mp. (40)

33 manual therap*.mp. (1013)

34 manipulative therapy.mp. (378)

35 cervical manipul*.mp. (133)

36 spine manipulation/ or cervical manipulation.mp. (122)

37 lumbar manipul*.mp. (16)

38 craniosacral manipul*.mp. (2)

39 craniosacral technique*.mp. (6)

40 craniosacral therapy.mp. (65)

41 osteopathic medicine.mp. (319)

42 visceral manipul*.mp. (9)

43 Soft tissue manipul*.mp. (15)

44 exp soft tissue therapy/ or Soft tissue therap*.mp. (44)

45 articular technique*.mp. (3)

46 counterstrain.mp. (40)

47 still technique.mp. (2)

48 tender point.mp. (106)

49 Manipulation, Osteopathic.mp. (504)

50 Manipulation, Spinal.mp. or exp spine manipulation/ (10)

51 Musculoskeletal Manipulations.mp. or exp Musculoskeletal Manipulations/ (6651)

52 SMT.mp. (107)

53 OMTh.mp. (14)

54 manual manipul*.mp. (41)

55 manual medicine.mp. (178)

56 OPP.mp. (13)

57 exp osteopathic manipulation/ or exp manipulative medicine/ or OMT.mp. or exp osteopathic medicine/ (215)

58 OMM.mp. (27)

59 spinal manipul*.mp. (1316)

60 dry needl*.mp. (228)

61 trigger point.mp. (316)

62 thrust manipul*.mp. (67)

63 exp myofascial release/ or myofascial release.mp. (165)

64 cranial osteopath*.mp. or exp cranial osteopathy/ (25)

65 facilitated positional release.mp. (6)

66 muscle energy technique*.mp. (49)

67 osteopathic massage.mp. (0)

68 High-velocity low amplitude.mp. (166)

69 or/30-68 (10419)

70 29 and 69 (741)

Date searched: July 30, 2023

No. results: 741

**Embase Search Strategy**

1 exp headache/di, ep, et, rh, th [Diagnosis, Epidemiology, Etiology, Rehabilitation, Therapy] (14319)

2 cephalgia.mp. (539)

3 exp neck pain/ or exp whiplash injury/ (34468)

4 whiplash associated disorder*.mp. (1186)

5 exp fibromyalgia/di, dm, ep, et, pc, rh, th [Diagnosis, Disease Management, Epidemiology, Etiology, Prevention, Rehabilitation, Therapy] (7125)

6 ibromyalgia.mp. (27)

7 exp primary headache/ or exp migraine/ or exp cluster headache/ or exp tension headache/ (85492)

8 Primary headache*.mp. (6154)

9 exp migraine without aura/ or exp migraine with aura/ (9048)

10 aura migraine.mp. (203)

11 cluster headache*.mp. (7453)

12 tension type headache*.mp. (5660)

13 exp new daily persistent headache/ or new daily persistent headache*.mp. (614)

14 exp cervicogenic headache/di, dm, ep, et, pc, rh, th [Diagnosis, Disease Management, Epidemiology, Etiology, Prevention, Rehabilitation, Therapy] (95)

15 cervicogenic.mp. (1449)

16 exp temporomandibular joint/ or exp temporomandibular joint disorder/ (27526)

17 exp secondary headache/ or secondary headache*.mp. (2275)

18 Headache Disorders, Primary.mp. (35)

19 exp posttraumatic headache/di, dm, ep, et, pc, th [Diagnosis, Disease Management, Epidemiology, Etiology, Prevention, Therapy] (253)

20 Post-Traumatic Headache.mp. (717)

21 Headache Disorders.mp. (5192)

22 exp postconcussion syndrome/co, di, ep, et, pc, rh, th [Complication, Diagnosis, Epidemiology, Etiology, Prevention, Rehabilitation, Therapy] (797)

23 Post-Concussion Syndrome.mp. (886)

24 Whiplash Injuries.mp. or exp whiplash injury/ (4752)

25 Temporomandibular Joint Disorders.mp. (2149)

26 Fibromyalgia.mp. (27144)

27 Headache Disorders, Secondary.mp. (30)

28 Temporomandibular Joint Dysfunction Syndrome.mp. (231)

29 (concussion adj5 headaches).mp. [mp=title, abstract, heading word, drug trade name, original title, device manufacturer, drug manufacturer, device trade name, keyword heading word, floating subheading word, candidate term word] (87)

30 1 or 2 or 3 or 4 or 5 or 6 or 7 or 8 or 9 or 10 or 11 or 12 or 13 or 14 or 15 or 16 or 17 or 18 or 19 or 20 or 21 or 22 or 23 or 24 or 25 or 26 or 27 or 28 or 29 (183705)

31 exp osteopathic physician/ (577)

32 osteopath.mp. (234)

33 exp manipulative medicine/ or HVLA.mp. (43435)

34 manual therap*.mp. (4879)

35 manipulative therapy.mp. (1108)

36 cervical manipul*.mp. (465)

37 spine manipulation/ or cervical manipulation.mp. (1352)

38 lumbar manipul*.mp. (44)

39 craniosacral manipul*.mp. (6)

40 craniosacral technique*.mp. (9)

41 exp osteopathic medicine/ or exp craniosacral therapy/ (5166)

42 visceral manipul*.mp. (50)

43 Soft tissue manipul*.mp. (129)

44 exp soft tissue therapy/ or Soft tissue therap*.mp. (241)

45 High velocity low amplitude.mp. (330)

46 osteopathic massage.mp. (1)

47 muscle energy technique*.mp. (229)

48 facilitated positional release.mp. (7)

49 cranial osteopath*.mp. or exp cranial osteopathy/ (285)

50 exp myofascial release/ or myofascial release.mp. (736)

51 thrust manipul*.mp. (182)

52 trigger point.mp. (4097)

53 dry needl*.mp. (1399)

54 spinal manipul*.mp. (2268)

55 OMM.mp. (974)

56 exp osteopathic manipulation/ or exp manipulative medicine/ or OMT.mp. or exp osteopathic medicine/ (45623)

57 OPP.mp. (1574)

58 manual medicine.mp. (441)

59 manual manipul*.mp. (548)

60 OMTh.mp. (20)

61 SMT.mp. (3659)

62 Musculoskeletal Manipulations.mp. or exp musculoskeletal manipulation/ (4748)

63 Manipulation, Spinal.mp. or exp spine manipulation/ (1097)

64 Manipulation, Osteopathic.mp. (26)

65 tender point.mp. (852)

66 still technique.mp. (9)

67 counterstrain.mp. (100)

68 articular technique*.mp. (72)

69 31 or 32 or 33 or 34 or 35 or 36 or 37 or 38 or 39 or 40 or 41 or 42 or 43 or 44 or 45 or 46 or 47 or 48 or 49 or 50 or 51 or 52 or 53 or 54 or 55 or 56 or 57 or 58 or 59 or 60 or 61 or 62 or 63 or 64 or 65 or 66 or 67 or 68 (59265)

70 30 and 69 (5985)

71 limit 70 to (human and english language) (5401)

Date searched: July 30, 2023

No. results: 5401

**Ovid Emcare Search Strategy**

1 exp headache/ (46843)

2 cephalgia.mp. (121)

3 exp neck pain/ or exp whiplash injury/ (9908)

4 whiplash associated disorder*.mp. (757)

5 exp fibromyalgia/ (6559)

6 fibromyalgia.mp. (8611)

7 exp primary headache/ or exp migraine/ or exp cluster headache/ or exp tension headache/ (16355)

8 Primary headache*.mp. (1627)

9 exp migraine without aura/ or exp migraine with aura/ (1678)

10 aura migraine.mp. (46)

11 cluster headache*.mp. (1786)

12 tension type headache*.mp. (1739)

13 exp new daily persistent headache/ or new daily persistent headache*.mp. (183)

14 exp cervicogenic headache/ (357)

15 (concussion adj5 headaches).mp. (29)

16 Temporomandibular Joint Dysfunction Syndrome.mp. (87)

17 Headache Disorders, Secondary.mp. (11)

18 Fibromyalgia.mp. (8611)

19 Temporomandibular Joint Disorders.mp. (958)

20 Whiplash Injuries.mp. or exp whiplash injury/ (1817)

21 Post-Concussion Syndrome.mp. (263)

22 exp postconcussion syndrome/ (773)

23 Headache Disorders.mp. (1569)

24 Post-Traumatic Headache.mp. (197)

25 Posttraumatic Headache.mp. (272)

26 exp posttraumatic headache/ (192)

27 Headache Disorders, Primary.mp. (12)

28 exp secondary headache/ or secondary headache*.mp. (654)

29 exp temporomandibular joint/ or exp temporomandibular joint disorder/ (8493)

30 cervicogenic.mp. (564)

31 or/1-30 (83151)

32 articular technique*.mp. (33)

33 counterstrain.mp. (85)

34 still technique.mp. (9)

35 tender point.mp. (318)

36 Manipulation, Osteopathic.mp. (19)

37 Manipulation, Spinal.mp. or exp spine manipulation/ (423)

38 Musculoskeletal Manipulations.mp. or exp musculoskeletal manipulation/ (1329)

39 SMT.mp. (747)

40 OMTh.mp. (19)

41 manual manipul*.mp. (164)

42 manual medicine.mp. (522)

43 OPP.mp. (207)

44 exp osteopathic manipulation/ or exp manipulative medicine/ or OMT.mp. or exp osteopathic medicine/ (19629)

45 OMM.mp. (193)

46 spinal manipul*.mp. (1494)

47 dry needl*.mp. (780)

48 trigger point.mp. (2044)

49 thrust manipul*.mp. (142)

50 exp myofascial release/ or myofascial release.mp. (497)

51 exp osteopathic physician/ (180)

52 osteopath.mp. (198)

53 exp manipulative medicine/ or HVLA.mp. (19072)

54 manual therap*.mp. (3228)

55 manipulative therapy.mp. (733)

56 cervical manipul*.mp. (229)

57 spine manipulation/ or cervical manipulation.mp. (478)

58 cranial osteopath*.mp. or exp cranial osteopathy/ (149)

59 facilitated positional release.mp. (5)

60 muscle energy technique*.mp. (198)

61 osteopathic massage.mp. (0)

62 High velocity low amplitude.mp. (277)

63 exp soft tissue therapy/ or Soft tissue therap*.mp. (99)

64 Soft tissue manipul*.mp. (56)

65 visceral manipul*.mp. (33)

66 exp osteopathic medicine/ or exp craniosacral therapy/ (2369)

67 craniosacral technique*.mp. (8)

68 craniosacral manipul*.mp. (3)

69 lumbar manipul*.mp. (29)

70 or/32-69 (25422)

71 31 and 70 (3044)

72 limit 71 to (human and english language) (2469)

Date searched: July 30, 2023

No. results: 2469

**Cumulative Index to Nursing and Allied Health Literature (CINAHL) Search Strategy**

Thesaurus Terms (exploded unless otherwise noted)

- Osteopathic physicians
- Osteopathy
- Osteopathic medicine
- Osteopaths
- Myofascial release
- Headache, primary
- Headache (not exploded)
- Headache, secondary (not exploded)
- Postconcussion syndrome
- Whiplash injuries
- Fibromyalgia
- Temporomandibular joint syndrome

((TI osteopath* OR AB osteopath*) OR (TI HVLA OR AB HVLA) OR (TI "manual therap*" OR AB "manual therap*") OR (TI "manipulative therap*" OR AB "manipulative therap*") OR (TI "cervical manipul*" OR AB "cervical manipul*") OR (TI "lumbar manipul*" OR AB "lumbar manipul*") OR (TI "craniosacral manipul*" OR AB "craniosacral manipul*") OR (TI "craniosacral technique*" OR AB "craniosacral technique*") OR (TI "visceral manipul*" OR AB "visceral manipul*") OR (TI "Soft tissue manipul*" OR AB "Soft tissue manipul*") OR (TI "Soft tissue therap*" OR AB "Soft tissue therap*") OR (TI "High velocity low amplitude" OR AB "High velocity low amplitude") OR ((TI osteopathic N3 massage) OR (AB osteopathic N3 massage)) OR (TI "muscle energy technique*" OR AB "muscle energy technique*") OR (TI "facilitated positional release" OR AB "facilitated positional release") OR (TI "cranial osteopath*" OR AB "cranial osteopath*") OR (TI "myofascial release" OR AB "myofascial release") OR (TI MRT OR AB MRT) OR (TI "craniosacral massag*" OR AB "craniosacral massag*") OR (TI "thrust manipul*" OR AB "thrust manipul*") OR (TI "trigger point" OR AB "trigger point") OR (TI "dry needl*" OR AB "dry needl*") OR (TI "spinal manipul*" OR AB "spinal manipul*") OR (TI OMM OR AB OMM) OR (TI OMT OR AB OMT) OR (TI OPP OR AB OPP) OR (TI "manual medicine" OR AB "manual medicine") OR (TI "manual manipul*" OR AB "manual manipul*") OR (TI OMTh OR AB OMTh) OR (TI SMT OR AB SMT) OR (TI "cranial manipul*" OR AB "cranial manipul*") OR (TI "articular technique*" OR AB "articular technique*") OR (TI counterstrain OR AB counterstrain) OR (TI "still technique" OR AB "still technique") OR (TI "tender point" OR AB "tender point") OR (MH "Osteopathic Physicians+") OR (MH "Osteopathy+") OR (MH "Osteopathic Medicine+") OR (MH "Myofascial Release") OR (MH “Osteopaths”)) AND ((TI cephalgia OR AB cephalgia) OR (TI "whiplash associated disorder*" OR AB "whiplash associated disorder*") OR (TI fibromyalgia OR AB fibromyalgia) OR (TI "Primary headache*" OR AB "Primary headache*") OR ((TI aura N3 migraine) OR (AB aura N3 migraine)) OR ((TI aura N3 migraines) OR (AB aura N3 migraines))OR (TI "migraine without aura" OR AB "migraine without aura") OR (TI "cluster headache*" OR AB "cluster headache*") OR (TI "tension type headache*" OR AB "tension type headache*") OR (TI "new daily persistent headache*" OR AB "new daily persistent headache*") OR (TI cervicogenic* OR AB cervicogenic*) OR (TI "temporal mandibular joint disorder*" OR AB "temporal mandibular joint disorder*") OR (TI "secondary headache*" OR AB "secondary headache*") OR (TI TTH OR AB TTH) OR (MH "Headache, Primary+") OR (MH "Headache") OR (MH "Postconcussion Syndrome") OR (MH "Whiplash Injuries+") OR (MH Fibromyalgia+) OR (MH "Temporomandibular Joint Syndrome") OR (MH "Headache, Secondary"))

Date searched: August 1, 2023

No. results: 921

**OSTMED Search Strategy**

Headache* OR Migraine*

Searched in title

A simpler search strategy was used because technical glitches prevented the use of multiline searching

Date searched: August 7, 2023

No. results: 69
